# Supplementary material for: Establishment of a Bivector Genetic Transformation System in Recalcitrant Maize Inbred Lines
Source: MDPI journal article supplement (doi:10.3390/agriculture11070663), 2021-07-14
Supplement: s1 [file s1]

**Table S1.** The construction of the vectors.

| System                 | Cassette                                           | Vector                                                                                                  | Restriction sites              | Reaction      |
|------------------------|----------------------------------------------------|---------------------------------------------------------------------------------------------------------|--------------------------------|---------------|
| <b>Bivector system</b> | pMD18T-CB<br>(pMD18T-ZmCTA1 <sub>pro</sub> ::BBM)  | pHB-CB-NW<br>( pHB-ZmCTA1 <sub>pro</sub> ::BBM-NOS <sub>pro</sub> ::WUS)                                | <i>EcoRI</i><br><i>HindIII</i> | ligase        |
|                        | pMD18T- NW<br>(pMD18T-NOS <sub>pro</sub> ::WUS)    |                                                                                                         | <i>HindIII</i><br><i>BamHI</i> | ligase        |
|                        | pMD18T-CB<br>(pMD18T-ZmCTA1 <sub>pro</sub> ::BBM)  | pHB-CB-AW<br>( pHB-ZmCTA1 <sub>pro</sub> ::BBM-Axig1 <sub>pro</sub> ::WUS)                              | <i>EcoRI</i><br><i>HindIII</i> | ligase        |
|                        | pMD18T- NW<br>(pMD18T- Axig1 <sub>pro</sub> ::WUS) |                                                                                                         | <i>HindIII</i><br><i>BamHI</i> | ligase        |
|                        | pMD18T-CB<br>(pMD18T-ZmPLTP <sub>pro</sub> ::BBM)  | pHB-PB-AW<br>( pHB-ZmPLTP <sub>pro</sub> ::BBM-Axig1 <sub>pro</sub> ::WUS)                              | <i>EcoRI</i><br><i>HindIII</i> | ligase        |
|                        | pMD18T- NW<br>(pMD18T- Axig1 <sub>pro</sub> ::WUS) |                                                                                                         | <i>HindIII</i><br><i>XbaI</i>  | ligase        |
|                        | GFP ORF                                            | pCA-GFP<br>(pCA-35S <sub>pro</sub> ::GFP)                                                               | <i>PstI</i>                    | recombination |
| <b>Linkage vectors</b> | pMD18T-CB<br>(pMD18T-ZmCTA1 <sub>pro</sub> ::BBM)  | pHB-CB-NW-GFP<br>( pHB-ZmCTA1 <sub>pro</sub> ::BBM-NOS <sub>pro</sub> ::WUS-35S <sub>pro</sub> ::GFP)   | <i>EcoRI</i><br><i>HindIII</i> | ligase        |
|                        | pMD18T- NW<br>(pMD18T-NOS <sub>pro</sub> ::WUS)    |                                                                                                         | <i>HindIII</i><br><i>BamHI</i> | ligase        |
|                        | pCA-GFP<br>(pCA-35S <sub>pro</sub> ::GFP)          |                                                                                                         | <i>HindIII</i>                 | recombination |
|                        | pMD18T-CB<br>(pMD18T-ZmCTA1 <sub>pro</sub> ::BBM)  | pHB-CB-AW-GFP<br>( pHB-ZmCTA1 <sub>pro</sub> ::BBM-Axig1 <sub>pro</sub> ::WUS-35S <sub>pro</sub> ::GFP) | <i>EcoRI</i><br><i>HindIII</i> | ligase        |
|                        | pMD18T- NW<br>(pMD18T- Axig1 <sub>pro</sub> ::WUS) |                                                                                                         | <i>HindIII</i><br><i>BamHI</i> | ligase        |
|                        | pCA-GFP<br>(pCA-35S <sub>pro</sub> ::GFP)          |                                                                                                         | <i>HindIII</i>                 | recombination |
|                        | pMD18T-CB<br>(pMD18T-ZmPLTP <sub>pro</sub> ::BBM)  | pHB-PB-AW<br>( pHB-ZmPLTP <sub>pro</sub> ::BBM-Axig1 <sub>pro</sub> ::WUS-35S <sub>pro</sub> ::GFP)     | <i>EcoRI</i><br><i>HindIII</i> | ligase        |
|                        | pMD18T- NW<br>(pMD18T- Axig1 <sub>pro</sub> ::WUS) |                                                                                                         | <i>HindIII</i><br><i>XbaI</i>  | ligase        |
|                        | pCA-GFP<br>(pCA-35S <sub>pro</sub> ::GFP)          |                                                                                                         | <i>HindIII</i>                 | recombination |

**Table S2.** Primers used in this study

| Purpose                      | Primer name | Sequence(5' to 3')                        |
|------------------------------|-------------|-------------------------------------------|
| Vector Construction          | GFP-f       | ATGGTGAGCAAGGGCGAGGA                      |
|                              | GFP-r       | TGTAATCGTACAGCTCGTCC                      |
|                              | AG-f        | AAAGCAGCGATGGGAAGCTTATCTGTCACTTTATTGTGAA  |
|                              | GP-r        | TGTGGGGGATAGATAAGCTTATTTTCATACTCAACTACAA  |
|                              | NG-f        | CTCCGCTCATGATCAAGCTTATCTGTCACTTTATTGTGAA  |
|                              | GC-r        | TGTAATCGTACGCAAAGCTTATTTTCATACTCAACTACAA  |
|                              | PS-Bbm-f    | ACGGTCACATATGCGTCGACATGGCCACTGTGAACAACCTG |
|                              | CS-Bbm-f    | GACACCTCAAATCAGTCGACATGGCCACTGTGAACAACCTG |
|                              | BS-Rbst-r   | GATACGAACGAAAGGTGCGACTTAAGTGTCGTTCCAGACAC |
|                              | H-CTA1-f    | AAGCTTTGCGTACGATTACATC                    |
|                              | CTA1-S-r    | GTCGACTGATTTGAGGTGTCAC                    |
|                              | H-Nos-f     | AAGCTTGATCATGAGCGGAGAATT                  |
|                              | Nos-S-r     | GTCGACAGATCCGGTGCAGATTATT                 |
|                              | H-Axig1-f   | AAGCTTCCCATCGCTGCTTTGTCT                  |
|                              | Axig1-S-r   | GTCGACGGGATCACTTTCCCTTGAT                 |
|                              | H-PLTP-f    | AAGCTTATCTATCCCCACAACCAC                  |
|                              | P-Sall-r    | GTCGACGCATATGTGACCGTGTGTT                 |
|                              | Sm-Rbst-f   | CCCGGGCTTTCGTTTCGTATCAT                   |
|                              | Rbst-E-r    | CGGAATTCCATGTTGTCAATC                     |
|                              | Sa-Rbst-f   | GTCGACCTTTCGTTTCGTATCAT                   |
|                              | Rbst-X-r    | GCTCTAGACATGTTGTCAATCAA                   |
|                              | Sa-Rbst-f   | GTCGACCTTTCGTTTCGTATCAT                   |
|                              | Rbst-B-r    | GGATCCCATGTTGTCAATCAAT                    |
| Identifying Transgenic Corns | GFP-f       | GGGCACAAGCTGGAGTACAA                      |
|                              | GFP-r       | GAACGTTGTGCGAAACCGATGA                    |
|                              | WUS-f       | AGATCGAGGGCAAGAACGTC                      |
|                              | WUS-r       | CCGTCGTCGCCGCAG                           |
|                              | BBM-f       | CAGGCCTGTACCACCCGT                        |
|                              | BBM-r       | GCAGACACGACAGTCCCC                        |
|                              | Bar-f       | GAAGTCCAGCTGCCAGAAAC                      |
|                              | Bar-r       | GCACCATCGTCAACCACTAC                      |
|                              | HYP-f       | CAAGACCTGCCTGAAACCGA                      |
|                              | HYP-r       | ATTGCCGTCAACCAAGCTCT                      |
| Southern Blot                | sGFP-f      | CCTGAAGTTCATCTGCACCAC                     |
|                              | sGFP-r      | CTTCTCGTTGGGGTCTTTGCT                     |
| Quantitative RT-PCR          | qCTA1-f     | AACCTCACTTGCTAGGCGAC                      |
|                              | qCTA1-r     | TTTACTTTTCGCGAGGGTGC                      |
|                              | qGFP-f      | GTACCCCGACCACATGAAG                       |
|                              | qGFP-r      | TCTTGTAGTTGCCGTCGTCC                      |
|                              | Actin-f     | TCCATCTTGGCATCTCTCAG                      |
|                              | Actin-r     | GTACCCGCATCAGGCATCTG                      |

**Table S3.** Summary data for Transformation Ratio of all trial groups.

| Genotype | Design                                                 | Plasmid | Number of Immature Embryos | Number of T0 Plants | Transformation Ratio (%) |
|----------|--------------------------------------------------------|---------|----------------------------|---------------------|--------------------------|
| Zheng58  | Three experimental groups for the bivector system test | pHB-NC  | 238                        | 7                   | 2.941176471              |
|          |                                                        | pCA-GFP |                            |                     |                          |
|          |                                                        | pHB-AC  | 695                        | 1                   | 0.143884892              |
|          |                                                        | pCA-GFP |                            |                     |                          |
|          |                                                        | pHB-AP  | 309                        | 0                   | 0                        |
|          |                                                        | pCA-GFP |                            |                     |                          |
|          | Three experimental groups for the linkage vector test  | pHB-NGC | 302                        | 0                   | 0                        |
|          |                                                        | pHB-AGC | 315                        | 0                   | 0                        |
|          |                                                        | pHB-AGP | 305                        | 0                   | 0                        |
|          | Control                                                | pCA-GFP | 319                        | 0                   | 0                        |
| Mo17     | Three experimental groups for the bivector system test | pHB-NC  | 501                        | 0                   | 0                        |
|          |                                                        | pCA-GFP |                            |                     |                          |
|          |                                                        | pHB-AC  | 301                        | 2                   | 0.664451827              |
|          |                                                        | pCA-GFP |                            |                     |                          |
|          |                                                        | pHB-AP  | 505                        | 0                   | 0                        |
|          |                                                        | pCA-GFP |                            |                     |                          |
|          | Three experimental groups for the linkage vector test  | pHB-NGC | 309                        | 0                   | 0                        |
|          |                                                        | pHB-AGC | 301                        | 0                   | 0                        |
|          |                                                        | pHB-AGP | 509                        | 8                   | 1.571709234              |
|          | Control                                                | pCA-GFP | 189                        | 0                   | 0                        |
| Chang7-2 | Three experimental groups for the bivector system test | pHB-NC  | 514                        | 0                   | 0                        |
|          |                                                        | pCA-GFP |                            |                     |                          |
|          |                                                        | pHB-AC  | 508                        | 0                   | 0                        |
|          |                                                        | pCA-GFP |                            |                     |                          |
|          |                                                        | pHB-AP  | 523                        | 0                   | 0                        |
|          |                                                        | pCA-GFP |                            |                     |                          |
|          | Three experimental groups for the linkage vector test  | pHB-NGC | 126                        | 0                   | 0                        |
|          |                                                        | pHB-AGC | 692                        | 4                   | 0.578034682              |
|          |                                                        | pHB-AGP | 200                        | 0                   | 0                        |
|          | Control                                                | pCA-GFP | 202                        | 0                   | 0                        |
| B73      | Three experimental groups for the bivector system test | pHB-NC  | 502                        | 0                   | 0                        |
|          |                                                        | pCA-GFP |                            |                     |                          |
|          |                                                        | pHB-AC  | 506                        | 0                   | 0                        |
|          |                                                        | pCA-GFP |                            |                     |                          |
|          |                                                        | pHB-AP  | 504                        | 0                   | 0                        |
|          |                                                        | pCA-GFP |                            |                     |                          |
|          | Three experimental groups for the linkage vector test  | pHB-NGC | 306                        | 0                   | 0                        |
|          |                                                        | pHB-AGC | 311                        | 0                   | 0                        |
|          |                                                        | pHB-AGP | 309                        | 0                   | 0                        |

|  |         |         |     |   |   |
|--|---------|---------|-----|---|---|
|  | Control | pCA-GFP | 301 | 0 | 0 |
|--|---------|---------|-----|---|---|

There are four inbred lines of Zheng58, Mo17, Chang7-2 and B73. Embryos were separated from the seeds of 14-16 day after Self-Pollination of inbred lines. Number of T0 plants is a quantity of successful transgenic corns. Transformation Ratio is calculated by number of T0 plants. [ (number of T0 plants ÷ number of embryos) × 100].
